# Supplementary material for: Selenium deficiency caused hepatitis in chickensviathe miR-138-5p/SelM/ROS/Ca2+overload pathway induced by hepatocyte necroptosis
Source: Royal Society of Chemistry journal article supplement (doi:10.1039/d3fo00683b), 2023-01-01
Supplement: d3fo00683b3.pdf [file d3fo00683b3.pdf]

**Table S1 Composition and nutrient levels of the basal diet**

| Ingredients                        | 1-14 d      |         | 15-35 d     |         |
|------------------------------------|-------------|---------|-------------|---------|
|                                    | Control (g) | -Se (g) | Control (g) | -Se (g) |
| Corn                               | 18720       | 18720   | 80520       | 80520   |
| Soybean                            | 8640        | 8640    | 26400       | 26400   |
| Bean cake                          | 7200        | 7200    | 19800       | 19800   |
| Premix                             | 1260        | 1260    | 4620        | 4620    |
| Vitamin                            | 10.8        | 10.8    | 39.6        | 39.6    |
| Trace elements<br>without selenium | None        | 36      | None        | 198     |
| Trace elements<br>contain selenium | 36          | None    | 198         | None    |
| Methionine                         | 43.2        | 43.2    | 132         | 132     |
| Lysine                             | 180         | 180     | 396         | 396     |
