# Supplementary material for: Selenium deficiency caused hepatitis in chickensviathe miR-138-5p/SelM/ROS/Ca2+overload pathway induced by hepatocyte necroptosis
Source: Royal Society of Chemistry journal article supplement (doi:10.1039/d3fo00683b), 2023-01-01
Supplement: d3fo00683b4.pdf [file d3fo00683b4.pdf]

**Table S2 Gene primers used in real-time PCR**

| Gene           | Forward Primer (5'→3')          | Reverse Primer (5'→3')          |
|----------------|---------------------------------|---------------------------------|
| IL1 $\beta$    | CACTGGGCATCAAGGGCTACAAG         | GTCCAGGCGGTAGAAGATGAAGC         |
| IL6            | GAAATCCCTCCTCGCCAATCTGAAG       | GCCCTCACGGTCTTCTCCATAAAC        |
| IL10           | GCTGTCACCGTTCTTCACCTG           | GGCTTTGTAGATCCCGTTCTCATCC       |
| PTGES          | CCGTGTTCTGTCATTCGCCTTC          | TCTGGGTTAGCAAATGCCTTCTTCC       |
| PTGER2         | CTCGCCATCATGACCATCACCTTC        | TTCTCGCTCTGGCTGAACTTGTTG        |
| PTGER4         | TCATGTTCATCTTCGGCGTGGTG         | TGGTCTCCTTCTGCTCCTTCCTG         |
| NF $\kappa$ B  | AGCAGGCAGAGGTGGTAGAAGAC         | AATCTTGTCATCTCCTTCAGCAGCAG      |
| COX2           | ACACATTCCAGCAGTTCCTCTACAAC      | CCAGCAACCCTACCAGCACTTTG         |
| TNF $\alpha$   | CAGGACAGCCTATGCCAACA            | ACAGCCAAGTCAACGCTCCT            |
| MLKL           | CACCGATAACCAGGAGCCAGT           | AGCCAGCAAGTCCACGATCT            |
| RIPK1          | TGCCTTCTGTTCCCTCACTGG           | CCTGCGTAGGTATTGCAGCTT           |
| RIPK3          | ACATCCTTCGCTCACAGCAA            | ACCTGTGCTGCCTTCTCTCC            |
| SeIM           | AAGAAGGACCACCCAGACCT            | GCTGTCCTGTCTCCCTCATC            |
| PDHX           | GTTCTCATGCCTGCTCTTTCTCCTAC      | ACCACCGCTTTGTCTGTTTCAATTC       |
| SDHB           | CCAGACTTGAGTAACTTCTACGCACA<br>G | AGTTTCTGACGGTCTTCTATGGATTG<br>C |
| LDHB           | TGGTGATTCTAGTGTGGCTGTTTGG       | AGTTCTCGCTGTCTTTGTCAGTTCC       |
| HK1            | ACGATGATGACCTGTGCTTATGAAGA<br>C | CTTGCTCACCATCCACCATCTCTATG<br>C |
| HK2            | CGTCCCATCTGCTCGCCTATTTTC        | AGCCGCATGTGGTACAGGTATTTG        |
| PK             | GACTCATCAAGGGAAGTGGCACAG        | ACAGCACATTCTCATCGCAGTTCTC       |
| PFK            | GATGGACGGGAGAGCCAAGTTTG         | CAGGTCGTGGTGTGGTGTGAG           |
| GAPDH          | AGAACATCATCCCAGCGT              | AGCCTTCACTACCCTCTTG             |
| gga-miR-138-5p | AGCUGGUGUUGUGAAUC               |                                 |
| U6             | CACGCAAATTCGTGAAGCGTTCCA        |                                 |
