# Supplementary material for: Selenium deficiency caused hepatitis in chickensviathe miR-138-5p/SelM/ROS/Ca2+overload pathway induced by hepatocyte necroptosis
Source: Royal Society of Chemistry journal article supplement (doi:10.1039/d3fo00683b), 2023-01-01
Supplement: d3fo00683b5.pdf [file d3fo00683b5.pdf]

**Table S3 Sequences of miR-138-5p mimic, inhibitor, and siRNA-SelM.**

| Regent               | Forward Primer (5'→3')                       | Reverse Primer (5'→3') |
|----------------------|----------------------------------------------|------------------------|
| si-SelM              | ACCATAACCTGGAGATGAA                          |                        |
| mir-138-5p mimic     | AGCUGGUGUUGUGAAUC                            | UCGACCACAACACUUAG      |
| mir-138-5p inhibitor | mGmAmUmUmCmAmCmAmAmCmAmCmCmAmGmCmU           |                        |
| mimic NC             | UUUGUACUACACAAAAGUACUG                       | AAACAUGAUGUGUUUCAUGAC  |
| inhibitor NC         | mCmAmGmUmAmCmUmUmUmUmGmUmGmUmAmGmUmAmCmAmAmA |                        |
