# Supplementary material for: Selenium deficiency caused hepatitis in chickensviathe miR-138-5p/SelM/ROS/Ca2+overload pathway induced by hepatocyte necroptosis
Source: Royal Society of Chemistry journal article supplement (doi:10.1039/d3fo00683b), 2023-01-01
Supplement: d3fo00683b6.pdf [file d3fo00683b6.pdf]

**Table S4 The antibodies used in the present study.**

| Antibody name     | Dilution ratio | Resource               |
|-------------------|----------------|------------------------|
| SeIM              | 1:200          | produced by our lab    |
| RIPK1             | 1:1000         | ABclonal Biotechnology |
| RIPK3             | 1:500          | produced by our lab    |
| MLKL              | 1:500          | produced by our lab    |
| CaMKII $\alpha$   | 1:1500         | Wanleibio, China       |
| p-CaMKII $\alpha$ | 1:1000         | ABclonal Biotechnology |
| SERCA1            | 1:500          | Wanleibio, China       |
| NLRP3             | 1:1000         | Wanleibio, China       |
| IL1 $\beta$       | 1:300          | Wanleibio, China       |
| TNF $\alpha$      | 1:500          | ABclonal Biotechnology |
| NF $\kappa$ B     | 1:500          | Wanleibio, China       |
| $\beta$ -actin    | 1:10000        | ABclonal Biotechnology |
