# Supplementary figures and images for: Selenium deficiency caused hepatitis in chickensviathe miR-138-5p/SelM/ROS/Ca2+overload pathway induced by hepatocyte necroptosis
Source: Royal Society of Chemistry journal article supplement (doi:10.1039/d3fo00683b), 2023-01-01

**A**

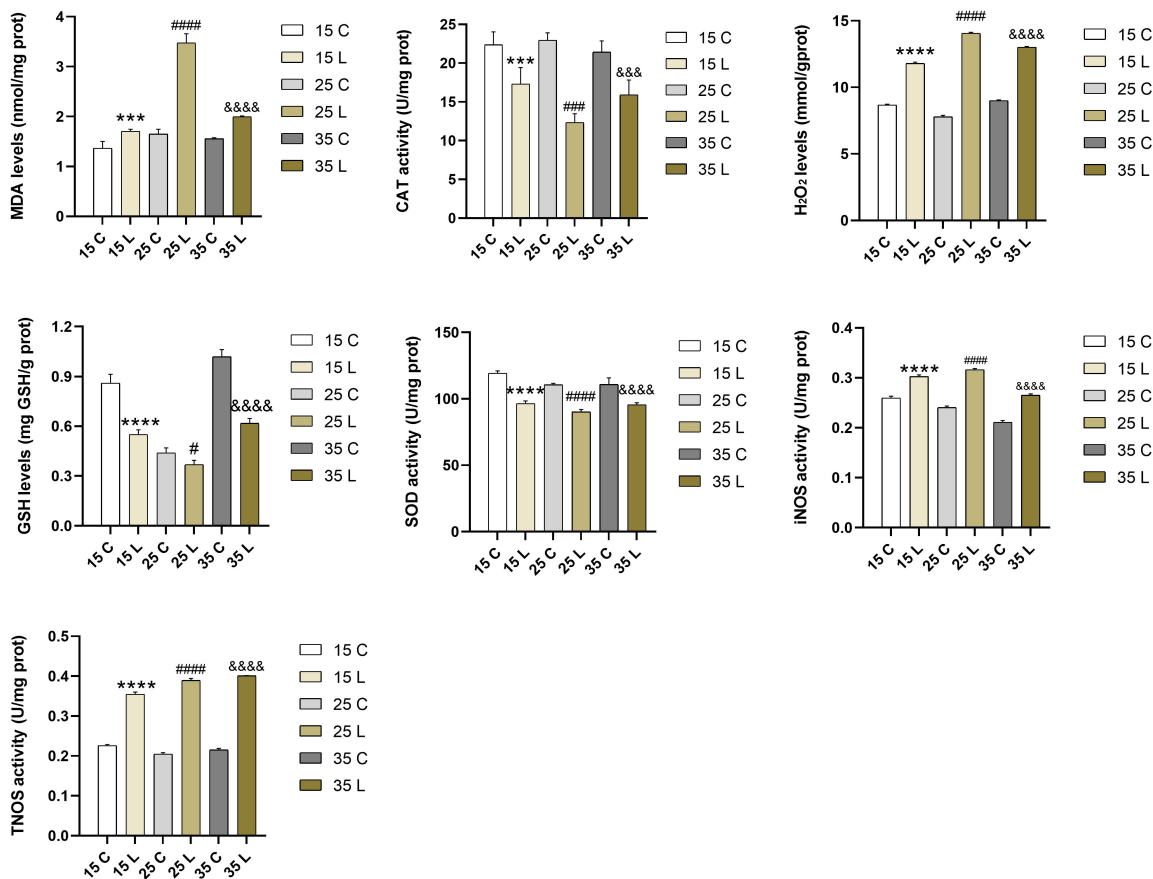

**B**

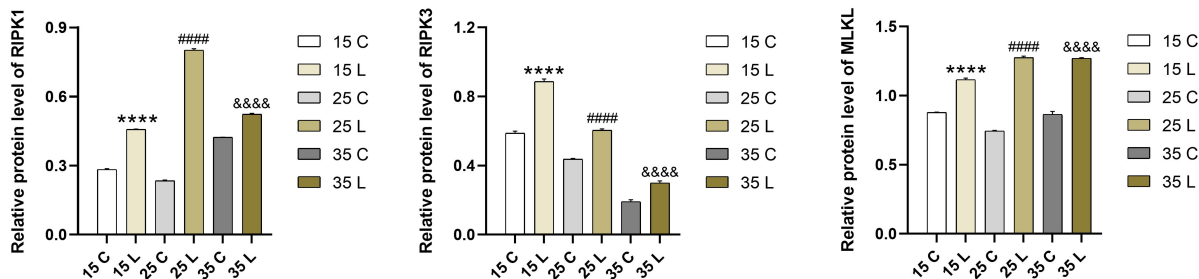

Supplement: d3fo00683b2.pdf [file d3fo00683b2.pdf]
